# Supplementary material for: Robust Extracellular pH Modulation by Candida albicans during Growth in Carboxylic Acids
Source: PubMed Central journal article supplement (PMC5111404; doi:10.1128/mbio.01646-16), 2016-11-15

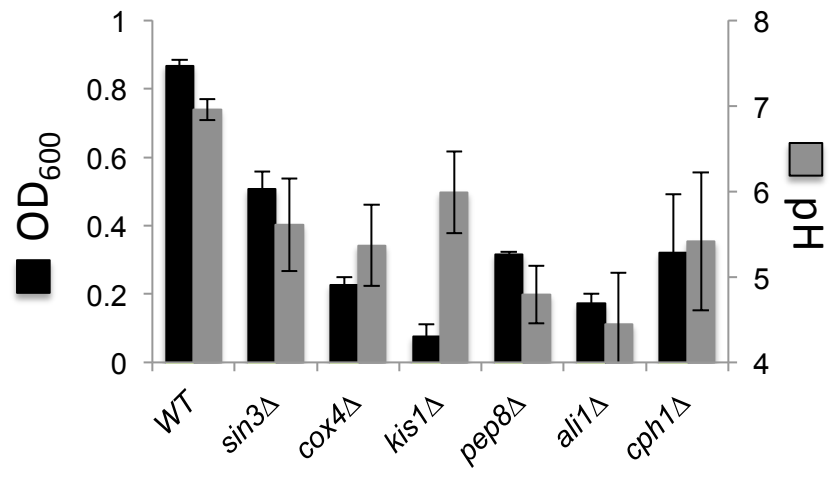

Supplement: mbo006163074sf2.pdf [file mbo006163074sf2.pdf]
