# Supplementary material for: Robust Extracellular pH Modulation by Candida albicans during Growth in Carboxylic Acids
Source: PubMed Central journal article supplement (PMC5111404; doi:10.1128/mbio.01646-16), 2016-11-15
Supplement: mbo006163074st1.pdf [file mbo006163074st1.pdf]

**Supplemental Table 1. RNA sequencing statistics**

| <b>Carbon Source<sup>1</sup></b> | <b>Replicate</b> | <b>Reads (million)</b> | <b>N (%)<sup>2</sup></b> | <b>Q20 (%)<sup>3</sup></b> | <b>GC (%)</b> | <b>Genome coverage<sup>4</sup></b> |
|----------------------------------|------------------|------------------------|--------------------------|----------------------------|---------------|------------------------------------|
| Glucose                          | 1                | 46.9                   | 0.071                    | 96.2                       | 36.6          | 166x                               |
| Glucose                          | 2                | 41.5                   | 0.070                    | 96.1                       | 36.5          | 147x                               |
| CAA                              | 1                | 42.6                   | 0.071                    | 96.2                       | 35.9          | 151x                               |
| CAA                              | 2                | 49.5                   | 0.071                    | 96.5                       | 35.8          | 175x                               |
| Glutamate                        | 1                | 44.1                   | 0.069                    | 96.5                       | 36.1          | 156x                               |
| Glutamate                        | 2                | 39.3                   | 0.072                    | 96.6                       | 35.3          | 139x                               |
| $\alpha$ KG                      | 1                | 47.2                   | 0.071                    | 96.2                       | 36.1          | 167x                               |
| $\alpha$ KG                      | 2                | 43.1                   | 0.071                    | 96.5                       | 35.8          | 152x                               |

1. The media was minimal YNB with 0.5% ammonium sulfate and 2% of the indicated compound.
2. Percentage of uncalled bases.
3. Percent of reads at Q20 (~99% accurate base calling) or higher.
4. Based on a diploid genome size of 28.6 Mbp (per Candida Genome Database).
